# Supplementary material for: Physiological and Transcriptome Responses to Combinations of Elevated CO2 and Magnesium in Arabidopsis thaliana
Source: PLoS One. 2016 Feb 16;11(2):e0149301. doi: 10.1371/journal.pone.0149301 (PMC4755599; doi:10.1371/journal.pone.0149301)
Supplement: S5 Table — (XLS) [file pone.0149301.s005.xls]

## Sheet: Sheet1
Table S5. Gene ontology analysis of differentially expressed genes
			CM										ALR		AHR		ELR		ECKR		HER		ALS		AHS		ELS		ECKS		EHS
Onto	GO Term	Description	ALR	AHR	ELR	ECKR	EHR	ALS	AHS	ELS	ECKS	EHS	FDR	Num	FDR	Num	FDR	Num	FDR	Num	FDR	Num	FDR	Num	FDR	Num	FDR	Num	FDR	Num	FDR	Num
GO:0009664	P	plant-type cell wall organization											6.1e-09	11	8.5e-05	8	0.017	5	0.0058	6	9e-06	13	---	---	---	---	---	---	---	---	---	---
GO:0050896	P	response to stimulus											1.6e-07	59	1.4e-08	74	8.6e-06	56	3.7e-12	86	1.7e-21	191	4.6e-47	728	1.3e-55	370	2.4e-58	507	1.5e-28	177	1.2e-57	512
GO:0010876	P	lipid localization											3.8e-06	6	---	---	9.1e-06	6	---	---	7e-12	14	1.5e-08	21	1.4e-06	11	5.9e-08	15	---	---	6.6e-13	21
GO:0006950	P	response to stress											3.8e-06	39	1e-06	48	1.2e-05	38	1.5e-07	52	9.9e-17	123	6.2e-31	440	9.2e-44	244	2.5e-41	318	3.5e-10	89	5.3e-38	314
GO:0042221	P	response to chemical stimulus											4.2e-05	34	0.00075	37	1e-05	36	7.3e-13	60	2.6e-18	119	3.4e-21	371	1.1e-33	208	1.4e-26	258	5.8e-21	107	3e-27	264
GO:0009611	P	response to wounding											6.9e-05	10	---	---	---	---	0.0012	10	---	---	0.00012	46	1e-22	52	1.8e-05	33	0.0014	13	1.1e-14	52
GO:0009605	P	response to external stimulus											0.0018	12	---	---	---	---	0.0002	16	---	---	1.6e-07	91	3.1e-19	68	2.6e-09	65	2.9e-05	24	2.9e-11	71
GO:0010035	P	response to inorganic substance											0.0059	9	---	---	0.002	10	0.033	9	0.00014	21	4e-05	60	0.0013	26	3.6e-05	40	---	---	0.0042	34
GO:0009607	P	response to biotic stimulus											0.014	13	5.3e-06	22	---	---	0.025	15	1.8e-05	37	2.3e-17	154	1.9e-22	90	1.7e-28	129	1.4e-09	40	2e-23	120
GO:0006810	P	transport											0.014	25	---	---	---	---	---	---	0.00071	69	0.0053	236	0.027	94	0.00012	155	---	---	0.012	143
GO:0051234	P	establishment of localization											0.014	25	---	---	---	---	---	---	0.00072	69	0.0041	238	0.029	94	0.00013	155	---	---	0.0098	144
GO:0006979	P	response to oxidative stress											0.014	9	0.0062	11	---	---	---	---	2.2e-05	25	0.0003	64	2.1e-05	34	0.0023	39	---	---	0.0053	38
GO:0051179	P	localization											0.021	25	---	---	---	---	---	---	0.00046	72	0.004	246	0.029	97	0.00013	160	---	---	0.0053	151
GO:0006869	P	lipid transport											0.026	6	---	---	---	---	---	---	0.0014	14	---	---	---	---	---	---	---	---	---	---
GO:0010038	P	response to metal ion											0.032	7	---	---	---	---	---	---	---	---	---	---	---	---	---	---	---	---	---	---
GO:0009409	P	response to cold											0.043	8	---	---	---	---	---	---	---	---	0.00013	65	3.3e-10	44	0.00023	42	0.0018	17	7e-05	44
GO:0005199	F	structural constituent of cell wall											3.1e-12	11	2.4e-09	10	4.9e-05	6	---	---	3.9e-08	12	---	---	---	---	---	---	---	---	---	---
GO:0016684	F	oxidoreductase activity, acting on peroxide as acceptor											1.3e-06	10	0.00014	9	0.023	5	---	---	6e-09	20	---	---	---	---	---	---	---	---	---	---
GO:0004601	F	peroxidase activity											1.3e-06	10	0.00014	9	0.023	5	---	---	6e-09	20	---	---	---	---	---	---	---	---	---	---
GO:0016209	F	antioxidant activity											4.4e-06	10	0.00041	9	0.044	5	---	---	4.2e-08	20	---	---	---	---	---	---	---	---	---	---
GO:0020037	F	heme binding											1.6e-05	8	0.0011	7	0.013	5	---	---	2.5e-08	17	---	---	---	---	---	---	---	---	---	---
GO:0005198	F	structural molecule activity											5.6e-05	17	0.05	13	0.0065	14	---	---	---	---	5.4e-05	111	---	---	---	---	---	---	---	---
GO:0046906	F	tetrapyrrole binding											0.00013	8	0.0051	7	0.00033	8	---	---	1.5e-08	20	0.0067	30	---	---	---	---	---	---	---	---
GO:0005506	F	iron ion binding											0.00036	8	0.0029	8	---	---	---	---	2.8e-06	18	---	---	---	---	---	---	---	---	---	---
GO:0030599	F	pectinesterase activity											0.01	6	0.0015	8	---	---	---	---	---	---	---	---	---	---	---	---	---	---	---	---
GO:0009055	F	electron carrier activity											0.016	8	0.0056	10	---	---	---	---	1.3e-05	23	---	---	---	---	---	---	---	---	---	---
GO:0016798	F	hydrolase activity, acting on glycosyl bonds											0.046	10	---	---	0.0086	12	---	---	---	---	---	---	---	---	0.016	49	0.041	20	---	---
GO:0003824	F	catalytic activity											0.05	80	4.6e-05	118	0.011	85	---	---	1.2e-06	279	7.1e-37	1333	3e-13	492	7.9e-28	791	0.00087	213	2.8e-19	762
GO:0016491	F	oxidoreductase activity											0.05	19	0.00068	29	0.013	21	---	---	2.5e-08	72	4.2e-07	224	---	---	0.0062	116	---	---	4.8e-05	135
GO:0030312	C	external encapsulating structure											3.3e-10	20	8.3e-07	18	0.012	10	---	---	9.8e-08	33	1.6e-12	100	0.00047	35	2.2e-06	55	---	---	8.5e-06	54
GO:0005618	C	cell wall											3.3e-10	20	8.3e-07	18	0.012	10	---	---	1.5e-07	32	4.5e-12	98	0.00047	35	1.9e-06	55	---	---	8.2e-06	54
GO:0009505	C	plant-type cell wall											1.1e-08	15	0.00035	11	0.027	7	---	---	6.9e-06	22	9.2e-08	62	0.0059	23	0.001	33	---	---	8.7e-05	37
GO:0006952	P	defense response											---	---	0.00025	21	---	---	---	---	6.6e-05	40	1.2e-19	181	2.7e-20	95	2e-41	168	2.9e-05	34	2.5e-23	133
GO:0051707	P	response to other organism											---	---	0.00034	18	---	---	0.033	14	7.1e-05	34	1e-15	143	6.8e-22	86	3.2e-26	120	1e-08	37	6e-24	117
GO:0009620	P	response to fungus											---	---	0.0051	8	---	---	---	---	0.0034	13	2.3e-06	45	5.2e-17	40	3.6e-12	42	0.00081	12	7.5e-12	42
GO:0051704	P	multi-organism process											---	---	0.0061	18	---	---	---	---	0.00072	37	4.8e-14	164	1.6e-18	92	1.1e-22	131	4.1e-07	39	1.4e-21	130
GO:0009404	P	toxin metabolic process											---	---	0.0061	5	---	---	---	---	2e-06	12	0.036	15	---	---	3.6e-05	16	---	---	---	---
GO:0009407	P	toxin catabolic process											---	---	0.0061	5	---	---	---	---	2e-06	12	0.036	15	---	---	3.6e-05	16	---	---	---	---
GO:0009414	P	response to water deprivation											---	---	0.0071	9	---	---	---	---	1.2e-05	21	0.0036	45	3.9e-11	38	---	---	0.0015	14	6.8e-07	40
GO:0009415	P	response to water											---	---	0.0092	9	---	---	---	---	6.9e-06	22	0.0046	46	1.3e-10	38	---	---	0.0023	14	1.9e-06	40
GO:0009617	P	response to bacterium											---	---	0.0099	9	---	---	---	---	9.8e-05	20	1.6e-07	63	4.7e-07	32	7.4e-14	56	6.1e-06	19	6.2e-11	51
GO:0019748	P	secondary metabolic process											---	---	0.0099	13	---	---	0.042	12	2e-08	38	2.6e-09	106	0.0003	40	2.4e-07	65	0.008	20	1.2e-08	70
GO:0050832	P	defense response to fungus											---	---	0.012	6	---	---	---	---	0.0022	11	5.9e-06	35	1.5e-10	26	3.8e-12	35	0.0032	9	1.1e-07	28
GO:0042545	P	cell wall modification											---	---	0.023	6	---	---	---	---	0.019	10	---	---	---	---	---	---	---	---	---	---
GO:0019438	P	aromatic compound biosynthetic process											---	---	0.03	8	---	---	---	---	0.013	15	3.3e-05	54	0.039	19	0.05	26	---	---	3.8e-06	39
GO:0009628	P	response to abiotic stimulus											---	---	0.035	24	---	---	0.0017	30	6.9e-06	66	2.9e-18	277	2.9e-14	124	1.1e-10	156	5e-16	79	3e-21	193
GO:0019825	F	oxygen binding											---	---	9.3e-06	14	0.023	7	---	---	6.8e-18	40	0.0022	49	0.028	21	0.0017	32	0.0031	15	0.00025	37
GO:0004364	F	glutathione transferase activity											---	---	0.0051	5	---	---	---	---	1.2e-06	12	0.02	16	---	---	1.1e-05	17	---	---	---	---
GO:0035251	F	UDP-glucosyltransferase activity											---	---	0.0051	6	---	---	---	---	---	---	2.3e-05	31	---	---	6.3e-07	24	0.0031	9	0.0031	18
GO:0015103	F	inorganic anion transmembrane transporter activity											---	---	0.016	5	---	---	---	---	0.038	7	---	---	---	---	---	---	---	---	---	---
GO:0004857	F	enzyme inhibitor activity											---	---	0.017	7	---	---	---	---	---	---	---	---	---	---	---	---	---	---	---	---
GO:0042626	F	ATPase activity, coupled to transmembrane movement of substances											---	---	0.019	7	---	---	---	---	0.0006	15	0.016	35	---	---	9.2e-05	29	---	---	---	---
GO:0043492	F	ATPase activity, coupled to movement of substances											---	---	0.019	7	---	---	---	---	0.0006	15	0.016	35	---	---	9.2e-05	29	---	---	---	---
GO:0015405	F	P-P-bond-hydrolysis-driven transmembrane transporter activity											---	---	0.019	8	---	---	---	---	0.0092	15	0.0027	47	---	---	0.00087	32	---	---	---	---
GO:0046527	F	glucosyltransferase activity											---	---	0.019	6	---	---	---	---	---	---	1.7e-08	47	0.0049	16	2.1e-06	28	0.0086	10	0.0018	23
GO:0015399	F	primary active transmembrane transporter activity											---	---	0.019	8	---	---	---	---	0.0092	15	0.0017	48	---	---	0.00045	33	---	---	---	---
GO:0016820	F	hydrolase activity, acting on acid anhydrides, catalyzing transmembrane movement of substances											---	---	0.019	7	---	---	---	---	0.00065	15	0.018	35	---	---	0.00011	29	---	---	---	---
GO:0016787	F	hydrolase activity											---	---	0.021	45	---	---	---	---	---	---	0.00048	426	---	---	3.7e-05	264	---	---	---	---
GO:0016705	F	oxidoreductase activity, acting on paired donors, with incorporation or reduction of molecular oxygen											---	---	0.024	7	---	---	---	---	0.0043	14	0.00077	43	---	---	---	---	---	---	---	---
GO:0008194	F	UDP-glycosyltransferase activity											---	---	0.04	7	---	---	---	---	0.025	13	1.2e-05	53	0.014	20	6.9e-05	33	0.0031	14	3.9e-05	36
GO:0004888	F	transmembrane receptor activity											---	---	0.05	6	---	---	---	---	---	---	0.004	36	0.032	16	7.4e-13	45	---	---	0.009	24
GO:0012505	C	endomembrane system											---	---	0.00033	52	0.019	37	---	---	8e-05	115	---	---	---	---	---	---	---	---	---	---
GO:0044464	C	cell part											---	---	0.0018	156	0.012	122	---	---	0.00036	388	4.7e-55	2006	1.9e-08	675	2.1e-20	1085	---	---	1.1e-19	1101
GO:0005623	C	cell											---	---	0.0018	156	0.012	122	---	---	0.00036	388	4.7e-55	2006	1.9e-08	675	2.1e-20	1085	---	---	1.1e-19	1101
GO:0005576	C	extracellular region											---	---	0.012	9	---	---	---	---	4e-06	24	0.0012	52	---	---	---	---	---	---	0.016	32
GO:0042398	P	cellular amino acid derivative biosynthetic process											---	---	---	---	0.015	8	0.015	9	0.0014	17	8.1e-05	52	0.0078	21	---	---	---	---	1.6e-05	37
GO:0009699	P	phenylpropanoid biosynthetic process											---	---	---	---	0.023	6	0.016	7	0.015	11	2.8e-05	39	---	---	---	---	---	---	0.0002	25
GO:0043436	P	oxoacid metabolic process											---	---	---	---	0.023	15	---	---	0.045	33	0.0012	128	0.0018	56	---	---	---	---	0.022	74
GO:0006519	P	cellular amino acid and derivative metabolic process											---	---	---	---	0.023	13	---	---	---	---	0.019	98	---	---	---	---	---	---	0.00026	71
GO:0006970	P	response to osmotic stress											---	---	---	---	0.023	10	---	---	---	---	0.00096	72	6.5e-06	40	0.0014	46	4.7e-07	27	3e-09	64
GO:0006082	P	organic acid metabolic process											---	---	---	---	0.023	15	---	---	0.045	33	0.0012	128	0.0019	56	---	---	---	---	0.023	74
GO:0019752	P	carboxylic acid metabolic process											---	---	---	---	0.023	15	---	---	0.045	33	0.0012	128	0.0018	56	---	---	---	---	0.022	74
GO:0042180	P	cellular ketone metabolic process											---	---	---	---	0.025	15	---	---	0.039	34	0.00028	135	0.0007	59	---	---	---	---	0.0065	79
GO:0009698	P	phenylpropanoid metabolic process											---	---	---	---	0.04	6	0.033	7	---	---	4.2e-05	44	---	---	---	---	---	---	1.8e-05	31
GO:0006575	P	cellular amino acid derivative metabolic process											---	---	---	---	0.04	8	---	---	0.011	18	0.00014	63	0.0063	26	---	---	---	---	1.1e-06	48
GO:0032787	P	monocarboxylic acid metabolic process											---	---	---	---	0.049	9	---	---	0.0025	23	4.7e-05	78	3.9e-05	38	---	---	---	---	0.0055	44
GO:0004568	F	chitinase activity											---	---	---	---	7.8e-06	6	---	---	0.00089	6	---	---	---	---	---	---	---	---	---	---
GO:0004553	F	hydrolase activity, hydrolyzing O-glycosyl compounds											---	---	---	---	0.011	11	---	---	---	---	---	---	---	---	0.03	44	---	---	---	---
GO:0022892	F	substrate-specific transporter activity											---	---	---	---	0.013	17	---	---	0.0013	44	0.001	152	---	---	8.3e-06	104	---	---	---	---
GO:0022891	F	substrate-specific transmembrane transporter activity											---	---	---	---	0.018	15	---	---	0.00089	40	0.00038	137	---	---	3.6e-07	98	---	---	---	---
GO:0022857	F	transmembrane transporter activity											---	---	---	---	0.021	17	---	---	4.9e-06	54	4e-06	177	---	---	2.8e-09	124	---	---	0.034	92
GO:0008509	F	anion transmembrane transporter activity											---	---	---	---	0.023	5	---	---	---	---	---	---	---	---	---	---	---	---	---	---
GO:0005215	F	transporter activity											---	---	---	---	0.023	20	---	---	3.6e-05	62	1.3e-05	216	---	---	1.3e-08	148	---	---	0.013	119
GO:0015075	F	ion transmembrane transporter activity											---	---	---	---	0.047	11	---	---	---	---	---	---	---	---	5.1e-05	70	---	---	---	---
GO:0005829	C	cytosol											---	---	---	---	0.019	15	---	---	---	---	0.0004	133	---	---	---	---	---	---	---	---
GO:0010033	P	response to organic substance											---	---	---	---	---	---	6.3e-10	42	2e-06	64	1.5e-13	240	1.1e-31	157	2.5e-19	174	4.6e-22	86	1.6e-25	194
GO:0010200	P	response to chitin											---	---	---	---	---	---	3.9e-07	13	3.7e-06	18	4.2e-06	43	7e-23	47	3.2e-19	52	0.00013	13	4.3e-07	32
GO:0009719	P	response to endogenous stimulus											---	---	---	---	---	---	1.6e-06	31	0.00011	49	1e-07	178	3.6e-21	117	2.5e-07	112	1.8e-15	65	3e-21	157
GO:0009725	P	response to hormone stimulus											---	---	---	---	---	---	2.8e-06	29	7.1e-05	47	3.3e-06	159	9.2e-13	92	4.7e-05	96	3.6e-13	58	4e-14	130
GO:0009743	P	response to carbohydrate stimulus											---	---	---	---	---	---	6.1e-06	14	0.0007	18	2.5e-05	55	6e-19	51	7.8e-15	57	0.00022	16	1.2e-05	38
GO:0000160	P	two-component signal transduction system (phosphorelay)											---	---	---	---	---	---	0.0018	7	0.042	8	---	---	0.00084	14	---	---	0.022	7	---	---
GO:0009736	P	cytokinin mediated signaling pathway											---	---	---	---	---	---	0.0058	5	0.032	6	---	---	---	---	---	---	---	---	---	---
GO:0009735	P	response to cytokinin stimulus											---	---	---	---	---	---	0.013	6	0.045	8	---	---	---	---	---	---	---	---	---	---
GO:0009723	P	response to ethylene stimulus											---	---	---	---	---	---	0.021	8	---	---	---	---	2.6e-06	27	0.025	24	0.00012	15	2.9e-05	33
GO:0009266	P	response to temperature stimulus											---	---	---	---	---	---	0.021	13	---	---	1.6e-07	99	2.4e-09	53	1.8e-06	62	0.0074	20	5.1e-05	58
GO:0009755	P	hormone-mediated signaling pathway											---	---	---	---	---	---	0.025	10	---	---	---	---	0.0004	30	---	---	0.00017	19	0.0098	36
GO:0032870	P	cellular response to hormone stimulus											---	---	---	---	---	---	0.025	10	---	---	---	---	0.0004	30	---	---	0.00017	19	0.0098	36
GO:0051252	P	regulation of RNA metabolic process											---	---	---	---	---	---	0.025	20	---	---	---	---	0.0016	63	0.018	83	0.0016	35	0.026	83
GO:0070887	P	cellular response to chemical stimulus											---	---	---	---	---	---	0.028	12	---	---	---	---	4.9e-06	43	0.0018	49	2.2e-05	25	0.00022	53
GO:0006355	P	regulation of transcription, DNA-dependent											---	---	---	---	---	---	0.041	19	---	---	---	---	0.0013	63	0.015	83	0.0014	35	0.022	83
GO:0051716	P	cellular response to stimulus											---	---	---	---	---	---	0.042	17	---	---	0.0015	125	8.8e-06	64	3.5e-05	86	0.00017	34	0.00027	83
GO:0009733	P	response to auxin stimulus											---	---	---	---	---	---	0.042	10	---	---	0.017	59	---	---	---	---	---	---	---	---
GO:0000156	F	two-component response regulator activity											---	---	---	---	---	---	0.019	5	0.011	6	---	---	---	---	---	---	---	---	---	---
GO:0030528	F	transcription regulator activity											---	---	---	---	---	---	0.034	39	0.032	74	---	---	0.00067	132	0.0036	180	1.1e-12	98	0.00063	194
GO:0006725	P	cellular aromatic compound metabolic process											---	---	---	---	---	---	---	---	0.00012	26	0.00012	75	0.0023	32	---	---	0.029	16	4.3e-07	57
GO:0042044	P	fluid transport											---	---	---	---	---	---	---	---	0.0014	5	---	---	---	---	---	---	---	---	---	---
GO:0006833	P	water transport											---	---	---	---	---	---	---	---	0.0014	5	---	---	---	---	---	---	---	---	---	---
GO:0006631	P	fatty acid metabolic process											---	---	---	---	---	---	---	---	0.0086	15	2e-05	53	0.0023	22	---	---	---	---	0.019	27
GO:0042742	P	defense response to bacterium											---	---	---	---	---	---	---	---	0.0091	13	2.7e-05	45	4e-05	23	7.6e-10	40	0.00055	13	1.4e-07	36
GO:0006955	P	immune response											---	---	---	---	---	---	---	---	0.01	20	4.7e-07	80	2.9e-11	49	2.3e-22	86	0.014	16	7.4e-09	59
GO:0002376	P	immune system process											---	---	---	---	---	---	---	---	0.01	20	5e-07	80	3e-11	49	2.4e-22	86	0.014	16	7.8e-09	59
GO:0009737	P	response to abscisic acid stimulus											---	---	---	---	---	---	---	---	0.013	20	7.5e-05	73	1.6e-13	54	0.00013	47	1.5e-07	27	4.7e-10	63
GO:0009631	P	cold acclimation											---	---	---	---	---	---	---	---	0.024	5	---	---	4e-05	10	---	---	6.1e-06	8	0.0015	10
GO:0005372	F	water transmembrane transporter activity											---	---	---	---	---	---	---	---	1.8e-10	15	0.014	14	---	---	---	---	---	---	---	---
GO:0015250	F	water channel activity											---	---	---	---	---	---	---	---	1.8e-10	15	0.014	14	---	---	---	---	---	---	---	---
GO:0015267	F	channel activity											---	---	---	---	---	---	---	---	4.9e-06	17	0.0043	33	---	---	0.00068	24	---	---	---	---
GO:0022838	F	substrate-specific channel activity											---	---	---	---	---	---	---	---	4.9e-06	17	0.0041	33	---	---	0.00065	24	---	---	---	---
GO:0022803	F	passive transmembrane transporter activity											---	---	---	---	---	---	---	---	4.9e-06	17	0.0043	33	---	---	0.00068	24	---	---	---	---
GO:0016765	F	transferase activity, transferring alkyl or aryl (other than methyl) groups											---	---	---	---	---	---	---	---	0.00015	15	0.023	31	---	---	0.022	20	---	---	---	---
GO:0005488	F	binding											---	---	---	---	---	---	---	---	0.0021	293	0.00032	1242	0.00013	496	2.4e-08	770	0.0031	238	0.0011	741
GO:0016747	F	transferase activity, transferring acyl groups other than amino-acyl groups											---	---	---	---	---	---	---	---	0.0074	17	---	---	---	---	---	---	---	---	---	---
GO:0016746	F	transferase activity, transferring acyl groups											---	---	---	---	---	---	---	---	0.0088	18	---	---	---	---	---	---	---	---	---	---
GO:0016740	F	transferase activity											---	---	---	---	---	---	---	---	0.01	100	3.4e-19	516	3.8e-11	208	6.3e-22	339	0.00087	90	2.9e-13	309
GO:0016887	F	ATPase activity											---	---	---	---	---	---	---	---	0.01	23	0.0033	78	---	---	1.8e-06	61	---	---	---	---
GO:0030246	F	carbohydrate binding											---	---	---	---	---	---	---	---	0.022	11	0.0033	35	---	---	0.0032	23	---	---	0.0096	23
GO:0022804	F	active transmembrane transporter activity											---	---	---	---	---	---	---	---	0.032	27	0.0015	103	---	---	2.7e-07	79	---	---	---	---
GO:0004091	F	carboxylesterase activity											---	---	---	---	---	---	---	---	0.035	18	---	---	---	---	---	---	---	---	---	---
GO:0003700	F	transcription factor activity											---	---	---	---	---	---	---	---	0.042	67	---	---	0.00067	121	0.0004	172	2e-13	94	6.6e-05	184
GO:0017111	F	nucleoside-triphosphatase activity											---	---	---	---	---	---	---	---	0.044	30	0.0013	119	---	---	9.8e-09	95	---	---	---	---
GO:0042623	F	ATPase activity, coupled											---	---	---	---	---	---	---	---	0.044	17	0.039	56	---	---	0.0025	40	---	---	---	---
GO:0048046	C	apoplast											---	---	---	---	---	---	---	---	0.0077	13	0.00013	41	---	---	---	---	---	---	---	---
GO:0008152	P	metabolic process											---	---	---	---	---	---	---	---	---	---	2.3e-14	1291	---	---	0.038	662	0.02	216	0.0098	684
GO:0009987	P	cellular process											---	---	---	---	---	---	---	---	---	---	2.2e-13	1393	8.3e-05	511	0.00055	753	---	---	0.00017	772
GO:0015979	P	photosynthesis											---	---	---	---	---	---	---	---	---	---	1.2e-09	54	---	---	---	---	0.012	10	---	---
GO:0044237	P	cellular metabolic process											---	---	---	---	---	---	---	---	---	---	1.1e-08	1040	---	---	---	---	---	---	---	---
GO:0009416	P	response to light stimulus											---	---	---	---	---	---	---	---	---	---	2e-07	114	0.0017	43	---	---	3e-08	36	3.9e-08	78
GO:0009314	P	response to radiation											---	---	---	---	---	---	---	---	---	---	7e-07	114	0.0016	44	---	---	5.3e-08	36	1.1e-07	78
GO:0045087	P	innate immune response											---	---	---	---	---	---	---	---	---	---	3.3e-06	74	1.6e-09	44	7.3e-20	79	0.0086	16	2.2e-07	53
GO:0019684	P	photosynthesis, light reaction											---	---	---	---	---	---	---	---	---	---	6.2e-06	34	---	---	---	---	---	---	---	---
GO:0044238	P	primary metabolic process											---	---	---	---	---	---	---	---	---	---	1.9e-05	1030	---	---	---	---	---	---	---	---
GO:0044262	P	cellular carbohydrate metabolic process											---	---	---	---	---	---	---	---	---	---	3.3e-05	80	---	---	---	---	---	---	---	---
GO:0065007	P	biological regulation											---	---	---	---	---	---	---	---	---	---	6e-05	515	1.2e-09	239	4.1e-09	339	1e-08	128	5.2e-08	338
GO:0006468	P	protein amino acid phosphorylation											---	---	---	---	---	---	---	---	---	---	0.00018	144	2.1e-08	78	1.7e-14	126	---	---	1.4e-08	109
GO:0009791	P	post-embryonic development											---	---	---	---	---	---	---	---	---	---	0.00019	114	---	---	---	---	0.0013	28	0.016	64
GO:0034641	P	cellular nitrogen compound metabolic process											---	---	---	---	---	---	---	---	---	---	0.00023	88	---	---	---	---	---	---	5.5e-06	63
GO:0009411	P	response to UV											---	---	---	---	---	---	---	---	---	---	0.0003	26	---	---	---	---	0.00063	9	0.0013	17
GO:0055114	P	oxidation reduction											---	---	---	---	---	---	---	---	---	---	0.00041	45	---	---	---	---	---	---	---	---
GO:0009651	P	response to salt stress											---	---	---	---	---	---	---	---	---	---	0.00043	68	0.00065	32	0.0011	43	2.8e-05	22	3.8e-08	57
GO:0007166	P	cell surface receptor linked signaling pathway											---	---	---	---	---	---	---	---	---	---	0.00048	40	0.00066	20	0.011	23	---	---	---	---
GO:0007167	P	enzyme linked receptor protein signaling pathway											---	---	---	---	---	---	---	---	---	---	0.00048	35	0.0015	17	0.025	19	---	---	---	---
GO:0007169	P	transmembrane receptor protein tyrosine kinase signaling pathway											---	---	---	---	---	---	---	---	---	---	0.00048	35	0.0015	17	0.025	19	---	---	---	---
GO:0031347	P	regulation of defense response											---	---	---	---	---	---	---	---	---	---	0.00067	22	4e-05	14	1.6e-06	20	---	---	0.01	13
GO:0006629	P	lipid metabolic process											---	---	---	---	---	---	---	---	---	---	0.00082	127	---	---	---	---	---	---	---	---
GO:0050794	P	regulation of cellular process											---	---	---	---	---	---	---	---	---	---	0.00096	413	1.2e-07	193	2.7e-08	280	5.3e-08	107	8.3e-08	282
GO:0006633	P	fatty acid biosynthetic process											---	---	---	---	---	---	---	---	---	---	0.001	34	0.01	15	---	---	---	---	---	---
GO:0009813	P	flavonoid biosynthetic process											---	---	---	---	---	---	---	---	---	---	0.0011	22	0.034	9	---	---	---	---	5.1e-05	18
GO:0006091	P	generation of precursor metabolites and energy											---	---	---	---	---	---	---	---	---	---	0.0011	55	---	---	---	---	---	---	---	---
GO:0005975	P	carbohydrate metabolic process											---	---	---	---	---	---	---	---	---	---	0.0011	129	---	---	---	---	---	---	---	---
GO:0080134	P	regulation of response to stress											---	---	---	---	---	---	---	---	---	---	0.0016	24	8.7e-05	15	2.4e-06	22	---	---	0.0092	15
GO:0006793	P	phosphorus metabolic process											---	---	---	---	---	---	---	---	---	---	0.0016	165	1e-06	85	8.6e-12	137	---	---	1.8e-07	123
GO:0016051	P	carbohydrate biosynthetic process											---	---	---	---	---	---	---	---	---	---	0.0017	53	---	---	---	---	---	---	---	---
GO:0009812	P	flavonoid metabolic process											---	---	---	---	---	---	---	---	---	---	0.0017	23	---	---	---	---	---	---	5e-06	21
GO:0009753	P	response to jasmonic acid stimulus											---	---	---	---	---	---	---	---	---	---	0.002	44	2.1e-14	42	1.5e-05	35	4.2e-06	18	2.9e-11	48
GO:0006796	P	phosphate metabolic process											---	---	---	---	---	---	---	---	---	---	0.002	164	1.8e-06	84	1.6e-11	136	---	---	2.9e-07	122
GO:0010224	P	response to UV-B											---	---	---	---	---	---	---	---	---	---	0.0029	17	---	---	---	---	1.5e-05	9	0.00025	14
GO:0009751	P	response to salicylic acid stimulus											---	---	---	---	---	---	---	---	---	---	0.0035	41	0.00061	22	3.9e-07	37	1.6e-06	18	4.8e-06	35
GO:0010114	P	response to red light											---	---	---	---	---	---	---	---	---	---	0.0036	22	---	---	0.011	14	1.5e-06	12	5.1e-05	19
GO:0009058	P	biosynthetic process											---	---	---	---	---	---	---	---	---	---	0.0037	591	---	---	---	---	---	---	---	---
GO:0065008	P	regulation of biological quality											---	---	---	---	---	---	---	---	---	---	0.0039	101	0.011	43	0.025	59	---	---	---	---
GO:0009642	P	response to light intensity											---	---	---	---	---	---	---	---	---	---	0.004	24	---	---	---	---	---	---	---	---
GO:0009408	P	response to heat											---	---	---	---	---	---	---	---	---	---	0.004	35	---	---	0.0054	23	---	---	---	---
GO:0016310	P	phosphorylation											---	---	---	---	---	---	---	---	---	---	0.0041	150	9.1e-07	80	3.8e-12	130	---	---	3.5e-07	114
GO:0043687	P	post-translational protein modification											---	---	---	---	---	---	---	---	---	---	0.0047	169	2.1e-07	91	6.1e-10	136	---	---	1.6e-06	124
GO:0015833	P	peptide transport											---	---	---	---	---	---	---	---	---	---	0.0047	20	---	---	0.0015	15	---	---	0.013	13
GO:0006857	P	oligopeptide transport											---	---	---	---	---	---	---	---	---	---	0.0047	20	---	---	0.0015	15	---	---	0.013	13
GO:0034637	P	cellular carbohydrate biosynthetic process											---	---	---	---	---	---	---	---	---	---	0.0047	37	---	---	---	---	---	---	---	---
GO:0009767	P	photosynthetic electron transport chain											---	---	---	---	---	---	---	---	---	---	0.0048	16	---	---	---	---	---	---	---	---
GO:0050789	P	regulation of biological process											---	---	---	---	---	---	---	---	---	---	0.0048	438	3.5e-07	205	6.9e-08	299	3.2e-07	111	1.6e-06	295
GO:0010218	P	response to far red light											---	---	---	---	---	---	---	---	---	---	0.0048	18	---	---	---	---	6.7e-06	10	0.0037	13
GO:0009814	P	defense response, incompatible interaction											---	---	---	---	---	---	---	---	---	---	0.0092	31	0.00066	18	2.8e-07	31	0.0014	11	3.4e-05	27
GO:0015837	P	amine transport											---	---	---	---	---	---	---	---	---	---	0.0098	19	---	---	0.011	13	---	---	---	---
GO:0012501	P	programmed cell death											---	---	---	---	---	---	---	---	---	---	0.01	45	0.0012	24	5.2e-11	50	---	---	0.015	29
GO:0033036	P	macromolecule localization											---	---	---	---	---	---	---	---	---	---	0.011	73	---	---	---	---	---	---	0.016	46
GO:0044249	P	cellular biosynthetic process											---	---	---	---	---	---	---	---	---	---	0.011	563	---	---	---	---	---	---	---	---
GO:0051555	P	flavonol biosynthetic process											---	---	---	---	---	---	---	---	---	---	0.012	7	---	---	---	---	---	---	---	---
GO:0046394	P	carboxylic acid biosynthetic process											---	---	---	---	---	---	---	---	---	---	0.012	67	0.049	28	---	---	---	---	0.033	41
GO:0007165	P	signal transduction											---	---	---	---	---	---	---	---	---	---	0.012	163	8.7e-06	84	1.7e-08	129	0.00034	43	5.5e-06	120
GO:0016053	P	organic acid biosynthetic process											---	---	---	---	---	---	---	---	---	---	0.012	67	0.049	28	---	---	---	---	0.033	41
GO:0051554	P	flavonol metabolic process											---	---	---	---	---	---	---	---	---	---	0.012	7	---	---	---	---	---	---	---	---
GO:0051552	P	flavone metabolic process											---	---	---	---	---	---	---	---	---	---	0.012	7	---	---	---	---	---	---	---	---
GO:0051553	P	flavone biosynthetic process											---	---	---	---	---	---	---	---	---	---	0.012	7	---	---	---	---	---	---	---	---
GO:0008219	P	cell death											---	---	---	---	---	---	---	---	---	---	0.013	50	0.0017	26	3.8e-12	57	---	---	0.032	31
GO:0016265	P	death											---	---	---	---	---	---	---	---	---	---	0.013	50	0.0017	26	3.8e-12	57	---	---	0.032	31
GO:0042440	P	pigment metabolic process											---	---	---	---	---	---	---	---	---	---	0.013	29	---	---	---	---	0.012	9	3.4e-05	26
GO:0006790	P	sulfur metabolic process											---	---	---	---	---	---	---	---	---	---	0.014	41	---	---	0.0007	31	---	---	---	---
GO:0009110	P	vitamin biosynthetic process											---	---	---	---	---	---	---	---	---	---	0.018	20	---	---	---	---	---	---	---	---
GO:0009627	P	systemic acquired resistance											---	---	---	---	---	---	---	---	---	---	0.018	16	0.009	9	0.00065	14	0.009	6	0.0024	13
GO:0006865	P	amino acid transport											---	---	---	---	---	---	---	---	---	---	0.018	18	---	---	0.025	12	---	---	---	---
GO:0019725	P	cellular homeostasis											---	---	---	---	---	---	---	---	---	---	0.02	34	0.026	16	0.013	23	---	---	---	---
GO:0044085	P	cellular component biogenesis											---	---	---	---	---	---	---	---	---	---	0.025	84	---	---	---	---	---	---	---	---
GO:0009644	P	response to high light intensity											---	---	---	---	---	---	---	---	---	---	0.028	16	---	---	---	---	---	---	---	---
GO:0006464	P	protein modification process											---	---	---	---	---	---	---	---	---	---	0.03	187	4.5e-05	93	2.3e-08	147	---	---	0.00041	128
GO:0044255	P	cellular lipid metabolic process											---	---	---	---	---	---	---	---	---	---	0.031	89	---	---	---	---	---	---	---	---
GO:0009808	P	lignin metabolic process											---	---	---	---	---	---	---	---	---	---	0.036	14	---	---	---	---	---	---	---	---
GO:0033559	P	unsaturated fatty acid metabolic process											---	---	---	---	---	---	---	---	---	---	0.037	7	---	---	---	---	---	---	---	---
GO:0009809	P	lignin biosynthetic process											---	---	---	---	---	---	---	---	---	---	0.039	13	---	---	---	---	---	---	---	---
GO:0009765	P	photosynthesis, light harvesting											---	---	---	---	---	---	---	---	---	---	0.039	10	---	---	---	---	---	---	---	---
GO:0046148	P	pigment biosynthetic process											---	---	---	---	---	---	---	---	---	---	0.041	24	---	---	---	---	0.016	8	0.0014	20
GO:0016772	F	transferase activity, transferring phosphorus-containing groups											---	---	---	---	---	---	---	---	---	---	3.2e-08	283	1.9e-09	132	1.7e-16	210	---	---	3.7e-08	181
GO:0016301	F	kinase activity											---	---	---	---	---	---	---	---	---	---	9.5e-08	250	6.8e-12	128	1.8e-18	197	---	---	1.3e-10	173
GO:0016757	F	transferase activity, transferring glycosyl groups											---	---	---	---	---	---	---	---	---	---	2.2e-07	107	0.002	41	0.001	56	---	---	0.0031	57
GO:0016758	F	transferase activity, transferring hexosyl groups											---	---	---	---	---	---	---	---	---	---	4.7e-07	76	0.013	27	0.00012	43	---	---	0.0014	42
GO:0001883	F	purine nucleoside binding											---	---	---	---	---	---	---	---	---	---	5.3e-05	210	0.002	86	7.3e-11	156	---	---	0.0048	122
GO:0001882	F	nucleoside binding											---	---	---	---	---	---	---	---	---	---	5.3e-05	210	0.002	86	7.3e-11	156	---	---	0.0048	122
GO:0030554	F	adenyl nucleotide binding											---	---	---	---	---	---	---	---	---	---	5.3e-05	210	0.002	86	7.3e-11	156	---	---	0.0048	122
GO:0032559	F	adenyl ribonucleotide binding											---	---	---	---	---	---	---	---	---	---	5.4e-05	200	0.0033	81	5.8e-11	151	---	---	0.012	113
GO:0005524	F	ATP binding											---	---	---	---	---	---	---	---	---	---	7.9e-05	198	0.0042	80	6.7e-11	150	---	---	0.013	112
GO:0016168	F	chlorophyll binding											---	---	---	---	---	---	---	---	---	---	0.00011	18	---	---	---	---	0.00087	7	---	---
GO:0016853	F	isomerase activity											---	---	---	---	---	---	---	---	---	---	0.00022	55	---	---	---	---	---	---	---	---
GO:0003735	F	structural constituent of ribosome											---	---	---	---	---	---	---	---	---	---	0.00026	86	---	---	---	---	---	---	---	---
GO:0060089	F	molecular transducer activity											---	---	---	---	---	---	---	---	---	---	0.00077	74	0.0046	33	6.4e-08	60	---	---	0.009	45
GO:0004871	F	signal transducer activity											---	---	---	---	---	---	---	---	---	---	0.00077	74	0.0046	33	6.4e-08	60	---	---	0.009	45
GO:0017076	F	purine nucleotide binding											---	---	---	---	---	---	---	---	---	---	0.00099	228	0.009	93	2.2e-08	164	---	---	0.026	132
GO:0032555	F	purine ribonucleotide binding											---	---	---	---	---	---	---	---	---	---	0.0011	218	0.014	88	1.4e-08	159	---	---	---	---
GO:0032553	F	ribonucleotide binding											---	---	---	---	---	---	---	---	---	---	0.0011	218	0.014	88	1.4e-08	159	---	---	---	---
GO:0004674	F	protein serine/threonine kinase activity											---	---	---	---	---	---	---	---	---	---	0.0015	105	2.9e-06	58	1.6e-05	74	---	---	0.0084	65
GO:0016462	F	pyrophosphatase activity											---	---	---	---	---	---	---	---	---	---	0.0017	123	---	---	1.9e-08	97	---	---	---	---
GO:0016818	F	hydrolase activity, acting on acid anhydrides, in phosphorus-containing anhydrides											---	---	---	---	---	---	---	---	---	---	0.002	123	---	---	2.3e-08	97	---	---	---	---
GO:0016817	F	hydrolase activity, acting on acid anhydrides											---	---	---	---	---	---	---	---	---	---	0.0022	123	---	---	2.4e-08	97	---	---	---	---
GO:0000166	F	nucleotide binding											---	---	---	---	---	---	---	---	---	---	0.0027	285	---	---	2.3e-07	198	---	---	---	---
GO:0080043	F	quercetin 3-O-glucosyltransferase activity											---	---	---	---	---	---	---	---	---	---	0.0036	12	---	---	0.0017	9	---	---	---	---
GO:0004672	F	protein kinase activity											---	---	---	---	---	---	---	---	---	---	0.0043	134	1.5e-06	74	2.7e-07	102	---	---	0.0038	87
GO:0016759	F	cellulose synthase activity											---	---	---	---	---	---	---	---	---	---	0.0069	14	---	---	---	---	---	---	---	---
GO:0016829	F	lyase activity											---	---	---	---	---	---	---	---	---	---	0.0083	69	---	---	---	---	---	---	0.016	44
GO:0046943	F	carboxylic acid transmembrane transporter activity											---	---	---	---	---	---	---	---	---	---	0.014	20	---	---	0.0026	15	---	---	---	---
GO:0005342	F	organic acid transmembrane transporter activity											---	---	---	---	---	---	---	---	---	---	0.014	20	---	---	0.0026	15	---	---	---	---
GO:0008519	F	ammonium transmembrane transporter activity											---	---	---	---	---	---	---	---	---	---	0.017	6	---	---	0.00081	6	---	---	0.012	5
GO:0016773	F	phosphotransferase activity, alcohol group as acceptor											---	---	---	---	---	---	---	---	---	---	0.018	152	4e-05	79	3.7e-05	108	---	---	0.0096	98
GO:0005515	F	protein binding											---	---	---	---	---	---	---	---	---	---	0.018	348	---	---	0.00095	219	---	---	---	---
GO:0015171	F	amino acid transmembrane transporter activity											---	---	---	---	---	---	---	---	---	---	0.023	17	---	---	0.0043	13	---	---	---	---
GO:0015101	F	organic cation transmembrane transporter activity											---	---	---	---	---	---	---	---	---	---	0.025	6	---	---	0.0012	6	---	---	0.016	5
GO:0016836	F	hydro-lyase activity											---	---	---	---	---	---	---	---	---	---	0.025	22	---	---	---	---	---	---	---	---
GO:0004872	F	receptor activity											---	---	---	---	---	---	---	---	---	---	0.028	38	0.022	19	7.3e-11	46	---	---	0.041	25
GO:0080044	F	quercetin 7-O-glucosyltransferase activity											---	---	---	---	---	---	---	---	---	---	0.035	9	---	---	0.012	7	---	---	---	---
GO:0008144	F	drug binding											---	---	---	---	---	---	---	---	---	---	0.035	10	---	---	---	---	---	---	---	---
GO:0003755	F	peptidyl-prolyl cis-trans isomerase activity											---	---	---	---	---	---	---	---	---	---	0.037	17	---	---	---	---	---	---	---	---
GO:0016859	F	cis-trans isomerase activity											---	---	---	---	---	---	---	---	---	---	0.041	17	---	---	---	---	---	---	---	---
GO:0016020	C	membrane											---	---	---	---	---	---	---	---	---	---	4.3e-40	698	1.9e-11	244	3.1e-22	394	---	---	8.5e-14	362
GO:0044444	C	cytoplasmic part											---	---	---	---	---	---	---	---	---	---	1.2e-37	955	---	---	0.00016	436	---	---	0.0004	440
GO:0005737	C	cytoplasm											---	---	---	---	---	---	---	---	---	---	5.8e-37	1013	---	---	1.5e-05	479	---	---	0.00017	477
GO:0044424	C	intracellular part											---	---	---	---	---	---	---	---	---	---	2.9e-33	1271	---	---	0.00029	614	---	---	0.0009	620
GO:0005622	C	intracellular											---	---	---	---	---	---	---	---	---	---	2.4e-31	1300	---	---	0.00012	641	---	---	0.002	637
GO:0009536	C	plastid											---	---	---	---	---	---	---	---	---	---	8.4e-31	519	---	---	0.0046	215	---	---	9.8e-07	248
GO:0043229	C	intracellular organelle											---	---	---	---	---	---	---	---	---	---	1.6e-30	1128	---	---	0.016	523	---	---	0.0019	546
GO:0043226	C	organelle											---	---	---	---	---	---	---	---	---	---	1.9e-30	1128	---	---	0.016	523	---	---	0.0018	547
GO:0009507	C	chloroplast											---	---	---	---	---	---	---	---	---	---	1.1e-29	485	---	---	0.0094	198	---	---	8.5e-06	226
GO:0043227	C	membrane-bounded organelle											---	---	---	---	---	---	---	---	---	---	7e-28	1054	---	---	0.0016	505	---	---	7.2e-05	531
GO:0043231	C	intracellular membrane-bounded organelle											---	---	---	---	---	---	---	---	---	---	1.1e-27	1052	---	---	0.0017	504	---	---	8.7e-05	529
GO:0005886	C	plasma membrane											---	---	---	---	---	---	---	---	---	---	3.3e-24	292	3e-11	115	1.9e-17	177	---	---	2.7e-12	163
GO:0044435	C	plastid part											---	---	---	---	---	---	---	---	---	---	6.8e-23	202	---	---	---	---	---	---	0.0035	79
GO:0044434	C	chloroplast part											---	---	---	---	---	---	---	---	---	---	1.8e-22	182	---	---	---	---	---	---	0.019	66
GO:0009579	C	thylakoid											---	---	---	---	---	---	---	---	---	---	2e-19	113	---	---	---	---	---	---	---	---
GO:0044446	C	intracellular organelle part											---	---	---	---	---	---	---	---	---	---	2.8e-18	412	---	---	---	---	---	---	---	---
GO:0044422	C	organelle part											---	---	---	---	---	---	---	---	---	---	2.8e-18	412	---	---	---	---	---	---	---	---
GO:0034357	C	photosynthetic membrane											---	---	---	---	---	---	---	---	---	---	6e-15	84	---	---	---	---	---	---	0.044	29
GO:0044436	C	thylakoid part											---	---	---	---	---	---	---	---	---	---	6e-15	90	---	---	---	---	---	---	---	---
GO:0009534	C	chloroplast thylakoid											---	---	---	---	---	---	---	---	---	---	1e-13	84	---	---	---	---	---	---	---	---
GO:0031976	C	plastid thylakoid											---	---	---	---	---	---	---	---	---	---	1.6e-13	84	---	---	---	---	---	---	---	---
GO:0031984	C	organelle subcompartment											---	---	---	---	---	---	---	---	---	---	2.1e-13	84	---	---	---	---	---	---	---	---
GO:0042651	C	thylakoid membrane											---	---	---	---	---	---	---	---	---	---	3.9e-12	72	---	---	---	---	---	---	---	---
GO:0055035	C	plastid thylakoid membrane											---	---	---	---	---	---	---	---	---	---	6.9e-12	69	---	---	---	---	---	---	---	---
GO:0009535	C	chloroplast thylakoid membrane											---	---	---	---	---	---	---	---	---	---	6.9e-12	69	---	---	---	---	---	---	---	---
GO:0009526	C	plastid envelope											---	---	---	---	---	---	---	---	---	---	2e-08	76	---	---	---	---	---	---	---	---
GO:0009941	C	chloroplast envelope											---	---	---	---	---	---	---	---	---	---	7.6e-08	64	---	---	---	---	---	---	---	---
GO:0010287	C	plastoglobule											---	---	---	---	---	---	---	---	---	---	7.6e-08	32	---	---	---	---	---	---	---	---
GO:0044425	C	membrane part											---	---	---	---	---	---	---	---	---	---	2.4e-07	207	0.0008	82	7.6e-05	122	---	---	0.044	105
GO:0031975	C	envelope											---	---	---	---	---	---	---	---	---	---	5.9e-07	108	---	---	---	---	---	---	---	---
GO:0031967	C	organelle envelope											---	---	---	---	---	---	---	---	---	---	5.9e-07	108	---	---	---	---	---	---	---	---
GO:0009521	C	photosystem											---	---	---	---	---	---	---	---	---	---	6.1e-07	27	---	---	---	---	---	---	---	---
GO:0005840	C	ribosome											---	---	---	---	---	---	---	---	---	---	7.1e-07	98	---	---	---	---	---	---	---	---
GO:0031090	C	organelle membrane											---	---	---	---	---	---	---	---	---	---	1.7e-06	138	---	---	---	---	---	---	---	---
GO:0005783	C	endoplasmic reticulum											---	---	---	---	---	---	---	---	---	---	2.3e-06	88	0.016	33	0.00022	53	---	---	0.016	46
GO:0033279	C	ribosomal subunit											---	---	---	---	---	---	---	---	---	---	2.7e-06	77	---	---	---	---	---	---	---	---
GO:0031974	C	membrane-enclosed lumen											---	---	---	---	---	---	---	---	---	---	3.5e-06	98	---	---	---	---	---	---	---	---
GO:0070013	C	intracellular organelle lumen											---	---	---	---	---	---	---	---	---	---	6e-06	96	---	---	---	---	---	---	---	---
GO:0043233	C	organelle lumen											---	---	---	---	---	---	---	---	---	---	6e-06	96	---	---	---	---	---	---	---	---
GO:0032991	C	macromolecular complex											---	---	---	---	---	---	---	---	---	---	1.4e-05	291	---	---	---	---	---	---	---	---
GO:0015934	C	large ribosomal subunit											---	---	---	---	---	---	---	---	---	---	2.3e-05	50	---	---	---	---	---	---	---	---
GO:0022626	C	cytosolic ribosome											---	---	---	---	---	---	---	---	---	---	4.2e-05	65	---	---	---	---	---	---	---	---
GO:0043232	C	intracellular non-membrane-bounded organelle											---	---	---	---	---	---	---	---	---	---	7.7e-05	153	---	---	---	---	---	---	---	---
GO:0043228	C	non-membrane-bounded organelle											---	---	---	---	---	---	---	---	---	---	7.7e-05	153	---	---	---	---	---	---	---	---
GO:0009532	C	plastid stroma											---	---	---	---	---	---	---	---	---	---	7.7e-05	62	---	---	---	---	---	---	0.042	33
GO:0009523	C	photosystem II											---	---	---	---	---	---	---	---	---	---	0.00012	18	---	---	---	---	---	---	---	---
GO:0031978	C	plastid thylakoid lumen											---	---	---	---	---	---	---	---	---	---	0.00014	26	---	---	---	---	---	---	---	---
GO:0009543	C	chloroplast thylakoid lumen											---	---	---	---	---	---	---	---	---	---	0.00014	26	---	---	---	---	---	---	---	---
GO:0031977	C	thylakoid lumen											---	---	---	---	---	---	---	---	---	---	0.00014	27	---	---	---	---	---	---	---	---
GO:0009570	C	chloroplast stroma											---	---	---	---	---	---	---	---	---	---	0.0004	49	---	---	---	---	---	---	---	---
GO:0005730	C	nucleolus											---	---	---	---	---	---	---	---	---	---	0.00094	42	---	---	---	---	---	---	---	---
GO:0022625	C	cytosolic large ribosomal subunit											---	---	---	---	---	---	---	---	---	---	0.0011	35	---	---	---	---	---	---	---	---
GO:0005773	C	vacuole											---	---	---	---	---	---	---	---	---	---	0.0012	65	---	---	0.00093	44	---	---	0.0046	42
GO:0030529	C	ribonucleoprotein complex											---	---	---	---	---	---	---	---	---	---	0.0016	104	---	---	---	---	---	---	---	---
GO:0044445	C	cytosolic part											---	---	---	---	---	---	---	---	---	---	0.0019	61	---	---	---	---	---	---	---	---
GO:0010598	C	NAD(P)H dehydrogenase complex (plastoquinone)											---	---	---	---	---	---	---	---	---	---	0.0019	9	---	---	---	---	---	---	---	---
GO:0031225	C	anchored to membrane											---	---	---	---	---	---	---	---	---	---	0.0023	49	0.00047	27	0.036	29	---	---	---	---
GO:0030076	C	light-harvesting complex											---	---	---	---	---	---	---	---	---	---	0.0039	12	---	---	---	---	---	---	---	---
GO:0009522	C	photosystem I											---	---	---	---	---	---	---	---	---	---	0.0044	10	---	---	---	---	---	---	---	---
GO:0031224	C	intrinsic to membrane											---	---	---	---	---	---	---	---	---	---	0.007	112	1.3e-05	62	3.6e-06	87	---	---	0.0068	73
GO:0030095	C	chloroplast photosystem II											---	---	---	---	---	---	---	---	---	---	0.0075	11	---	---	---	---	---	---	---	---
GO:0043234	C	protein complex											---	---	---	---	---	---	---	---	---	---	0.0078	184	---	---	---	---	---	---	---	---
GO:0005788	C	endoplasmic reticulum lumen											---	---	---	---	---	---	---	---	---	---	0.023	6	---	---	0.019	5	---	---	0.022	5
GO:0044459	C	plasma membrane part											---	---	---	---	---	---	---	---	---	---	0.024	38	0.015	20	---	---	---	---	0.044	25
GO:0009538	C	photosystem I reaction center											---	---	---	---	---	---	---	---	---	---	0.033	6	---	---	---	---	---	---	---	---
GO:0000313	C	organellar ribosome											---	---	---	---	---	---	---	---	---	---	0.033	15	---	---	---	---	---	---	---	---
GO:0010319	C	stromule											---	---	---	---	---	---	---	---	---	---	0.035	13	---	---	---	---	---	---	---	---
GO:0031981	C	nuclear lumen											---	---	---	---	---	---	---	---	---	---	0.036	56	---	---	---	---	---	---	---	---
GO:0009547	C	plastid ribosome											---	---	---	---	---	---	---	---	---	---	0.047	12	---	---	---	---	---	---	---	---
GO:0048583	P	regulation of response to stimulus											---	---	---	---	---	---	---	---	---	---	---	---	1e-05	25	4.8e-05	31	0.00091	13	0.017	24
GO:0031407	P	oxylipin metabolic process											---	---	---	---	---	---	---	---	---	---	---	---	5.5e-05	11	---	---	---	---	0.00071	12
GO:0048585	P	negative regulation of response to stimulus											---	---	---	---	---	---	---	---	---	---	---	---	7.9e-05	15	0.0072	15	0.013	7	---	---
GO:0009694	P	jasmonic acid metabolic process											---	---	---	---	---	---	---	---	---	---	---	---	0.00011	10	---	---	---	---	0.0011	11
GO:0009695	P	jasmonic acid biosynthetic process											---	---	---	---	---	---	---	---	---	---	---	---	0.00025	9	---	---	---	---	0.0015	10
GO:0031408	P	oxylipin biosynthetic process											---	---	---	---	---	---	---	---	---	---	---	---	0.00045	9	---	---	---	---	0.0028	10
GO:0009873	P	ethylene mediated signaling pathway											---	---	---	---	---	---	---	---	---	---	---	---	0.00048	13	---	---	0.034	6	---	---
GO:0007242	P	intracellular signaling cascade											---	---	---	---	---	---	---	---	---	---	---	---	0.00062	48	---	---	0.00046	28	0.0092	62
GO:0043412	P	macromolecule modification											---	---	---	---	---	---	---	---	---	---	---	---	0.00065	95	2.8e-07	154	---	---	0.0092	130
GO:0009968	P	negative regulation of signal transduction											---	---	---	---	---	---	---	---	---	---	---	---	0.0023	9	---	---	0.0032	6	---	---
GO:0010648	P	negative regulation of cell communication											---	---	---	---	---	---	---	---	---	---	---	---	0.0023	9	---	---	0.0032	6	---	---
GO:0006351	P	transcription, DNA-dependent											---	---	---	---	---	---	---	---	---	---	---	---	0.0025	64	0.018	86	0.00087	37	0.035	85
GO:0032774	P	RNA biosynthetic process											---	---	---	---	---	---	---	---	---	---	---	---	0.0025	64	0.018	86	0.00087	37	0.036	85
GO:0009738	P	abscisic acid mediated signaling pathway											---	---	---	---	---	---	---	---	---	---	---	---	0.003	13	---	---	---	---	---	---
GO:0009816	P	defense response to bacterium, incompatible interaction											---	---	---	---	---	---	---	---	---	---	---	---	0.0033	8	0.0048	10	---	---	0.0013	11
GO:0009867	P	jasmonic acid mediated signaling pathway											---	---	---	---	---	---	---	---	---	---	---	---	0.0052	9	---	---	---	---	---	---
GO:0009889	P	regulation of biosynthetic process											---	---	---	---	---	---	---	---	---	---	---	---	0.0063	100	0.025	140	3.2e-07	69	0.0017	152
GO:0031326	P	regulation of cellular biosynthetic process											---	---	---	---	---	---	---	---	---	---	---	---	0.0063	100	0.025	140	3.2e-07	69	0.0017	152
GO:0045449	P	regulation of transcription											---	---	---	---	---	---	---	---	---	---	---	---	0.0077	96	0.025	135	5.8e-07	66	0.0029	145
GO:0002682	P	regulation of immune system process											---	---	---	---	---	---	---	---	---	---	---	---	0.0078	8	0.032	9	---	---	---	---
GO:0050776	P	regulation of immune response											---	---	---	---	---	---	---	---	---	---	---	---	0.0078	8	0.032	9	---	---	---	---
GO:0002252	P	immune effector process											---	---	---	---	---	---	---	---	---	---	---	---	0.0084	7	0.025	8	---	---	---	---
GO:0042538	P	hyperosmotic salinity response											---	---	---	---	---	---	---	---	---	---	---	---	0.009	9	---	---	0.009	6	0.0074	12
GO:0031348	P	negative regulation of defense response											---	---	---	---	---	---	---	---	---	---	---	---	0.0093	6	0.0013	9	---	---	---	---
GO:0031323	P	regulation of cellular metabolic process											---	---	---	---	---	---	---	---	---	---	---	---	0.011	105	---	---	1.5e-07	74	0.002	162
GO:0010118	P	stomatal movement											---	---	---	---	---	---	---	---	---	---	---	---	0.014	9	---	---	---	---	---	---
GO:0010556	P	regulation of macromolecule biosynthetic process											---	---	---	---	---	---	---	---	---	---	---	---	0.014	96	0.025	138	5.8e-07	67	0.0037	147
GO:0019219	P	regulation of nucleobase, nucleoside, nucleotide and nucleic acid metabolic process											---	---	---	---	---	---	---	---	---	---	---	---	0.015	96	0.041	136	1.3e-06	66	0.0053	146
GO:0030005	P	cellular di-, tri-valent inorganic cation homeostasis											---	---	---	---	---	---	---	---	---	---	---	---	0.015	9	---	---	---	---	---	---
GO:0051171	P	regulation of nitrogen compound metabolic process											---	---	---	---	---	---	---	---	---	---	---	---	0.019	97	0.048	138	6.1e-07	68	0.0051	149
GO:0006350	P	transcription											---	---	---	---	---	---	---	---	---	---	---	---	0.023	98	---	---	1.2e-06	68	0.016	147
GO:0006972	P	hyperosmotic response											---	---	---	---	---	---	---	---	---	---	---	---	0.024	9	---	---	0.018	6	0.023	12
GO:0009696	P	salicylic acid metabolic process											---	---	---	---	---	---	---	---	---	---	---	---	0.024	5	---	---	---	---	---	---
GO:0009692	P	ethylene metabolic process											---	---	---	---	---	---	---	---	---	---	---	---	0.024	6	---	---	---	---	---	---
GO:0009693	P	ethylene biosynthetic process											---	---	---	---	---	---	---	---	---	---	---	---	0.024	6	---	---	---	---	---	---
GO:0080090	P	regulation of primary metabolic process											---	---	---	---	---	---	---	---	---	---	---	---	0.024	99	---	---	1.7e-06	68	0.0053	153
GO:0055066	P	di-, tri-valent inorganic cation homeostasis											---	---	---	---	---	---	---	---	---	---	---	---	0.025	9	---	---	---	---	---	---
GO:0043067	P	regulation of programmed cell death											---	---	---	---	---	---	---	---	---	---	---	---	0.026	7	---	---	---	---	---	---
GO:0006915	P	apoptosis											---	---	---	---	---	---	---	---	---	---	---	---	0.029	15	7.6e-08	34	---	---	---	---
GO:0043449	P	cellular alkene metabolic process											---	---	---	---	---	---	---	---	---	---	---	---	0.031	6	---	---	---	---	---	---
GO:0043450	P	alkene biosynthetic process											---	---	---	---	---	---	---	---	---	---	---	---	0.031	6	---	---	---	---	---	---
GO:0006874	P	cellular calcium ion homeostasis											---	---	---	---	---	---	---	---	---	---	---	---	0.035	6	0.025	8	---	---	0.028	8
GO:0055074	P	calcium ion homeostasis											---	---	---	---	---	---	---	---	---	---	---	---	0.035	6	0.025	8	---	---	0.028	8
GO:0009624	P	response to nematode											---	---	---	---	---	---	---	---	---	---	---	---	0.037	9	0.015	13	---	---	0.0061	14
GO:0010941	P	regulation of cell death											---	---	---	---	---	---	---	---	---	---	---	---	0.039	7	---	---	---	---	---	---
GO:0009863	P	salicylic acid mediated signaling pathway											---	---	---	---	---	---	---	---	---	---	---	---	0.043	7	0.019	10	---	---	---	---
GO:0005509	F	calcium ion binding											---	---	---	---	---	---	---	---	---	---	---	---	6.8e-06	28	0.0051	27	---	---	0.014	27
GO:0016563	F	transcription activator activity											---	---	---	---	---	---	---	---	---	---	---	---	0.0042	19	---	---	---	---	---	---
GO:0003677	F	DNA binding											---	---	---	---	---	---	---	---	---	---	---	---	0.019	141	---	---	1.8e-08	98	---	---
GO:0016840	F	carbon-nitrogen lyase activity											---	---	---	---	---	---	---	---	---	---	---	---	0.023	6	---	---	---	---	---	---
GO:0016844	F	strictosidine synthase activity											---	---	---	---	---	---	---	---	---	---	---	---	0.028	5	---	---	---	---	---	---
GO:0016843	F	amine-lyase activity											---	---	---	---	---	---	---	---	---	---	---	---	0.028	5	---	---	---	---	---	---
GO:0004683	F	calmodulin-dependent protein kinase activity											---	---	---	---	---	---	---	---	---	---	---	---	0.047	7	---	---	---	---	---	---
GO:0031226	C	intrinsic to plasma membrane											---	---	---	---	---	---	---	---	---	---	---	---	0.023	10	---	---	---	---	---	---
GO:0016143	P	S-glycoside metabolic process											---	---	---	---	---	---	---	---	---	---	---	---	---	---	0.00065	15	---	---	---	---
GO:0019757	P	glycosinolate metabolic process											---	---	---	---	---	---	---	---	---	---	---	---	---	---	0.00065	15	---	---	---	---
GO:0019760	P	glucosinolate metabolic process											---	---	---	---	---	---	---	---	---	---	---	---	---	---	0.00065	15	---	---	---	---
GO:0010120	P	camalexin biosynthetic process											---	---	---	---	---	---	---	---	---	---	---	---	---	---	0.0023	6	---	---	---	---
GO:0052317	P	camalexin metabolic process											---	---	---	---	---	---	---	---	---	---	---	---	---	---	0.0023	6	---	---	---	---
GO:0034050	P	host programmed cell death induced by symbiont											---	---	---	---	---	---	---	---	---	---	---	---	---	---	0.0025	13	---	---	---	---
GO:0009626	P	plant-type hypersensitive response											---	---	---	---	---	---	---	---	---	---	---	---	---	---	0.0025	13	---	---	---	---
GO:0042431	P	indole metabolic process											---	---	---	---	---	---	---	---	---	---	---	---	---	---	0.0049	6	---	---	---	---
GO:0009700	P	indole phytoalexin biosynthetic process											---	---	---	---	---	---	---	---	---	---	---	---	---	---	0.0049	6	---	---	---	---
GO:0052315	P	phytoalexin biosynthetic process											---	---	---	---	---	---	---	---	---	---	---	---	---	---	0.0049	6	---	---	---	---
GO:0052314	P	phytoalexin metabolic process											---	---	---	---	---	---	---	---	---	---	---	---	---	---	0.0049	6	---	---	---	---
GO:0046217	P	indole phytoalexin metabolic process											---	---	---	---	---	---	---	---	---	---	---	---	---	---	0.0049	6	---	---	---	---
GO:0009991	P	response to extracellular stimulus											---	---	---	---	---	---	---	---	---	---	---	---	---	---	0.0049	19	---	---	---	---
GO:0033554	P	cellular response to stress											---	---	---	---	---	---	---	---	---	---	---	---	---	---	0.0049	43	---	---	---	---
GO:0009817	P	defense response to fungus, incompatible interaction											---	---	---	---	---	---	---	---	---	---	---	---	---	---	0.0052	10	---	---	---	---
GO:0031668	P	cellular response to extracellular stimulus											---	---	---	---	---	---	---	---	---	---	---	---	---	---	0.0052	17	---	---	---	---
GO:0042434	P	indole derivative metabolic process											---	---	---	---	---	---	---	---	---	---	---	---	---	---	0.0058	12	---	---	---	---
GO:0042430	P	indole and derivative metabolic process											---	---	---	---	---	---	---	---	---	---	---	---	---	---	0.0058	12	---	---	---	---
GO:0015695	P	organic cation transport											---	---	---	---	---	---	---	---	---	---	---	---	---	---	0.0059	5	---	---	---	---
GO:0015696	P	ammonium transport											---	---	---	---	---	---	---	---	---	---	---	---	---	---	0.0059	5	---	---	---	---
GO:0009615	P	response to virus											---	---	---	---	---	---	---	---	---	---	---	---	---	---	0.0075	12	---	---	---	---
GO:0016137	P	glycoside metabolic process											---	---	---	---	---	---	---	---	---	---	---	---	---	---	0.0089	17	---	---	---	---
GO:0016144	P	S-glycoside biosynthetic process											---	---	---	---	---	---	---	---	---	---	---	---	---	---	0.011	10	---	---	---	---
GO:0019758	P	glycosinolate biosynthetic process											---	---	---	---	---	---	---	---	---	---	---	---	---	---	0.011	10	---	---	---	---
GO:0019761	P	glucosinolate biosynthetic process											---	---	---	---	---	---	---	---	---	---	---	---	---	---	0.011	10	---	---	---	---
GO:0006811	P	ion transport											---	---	---	---	---	---	---	---	---	---	---	---	---	---	0.015	43	---	---	---	---
GO:0042592	P	homeostatic process											---	---	---	---	---	---	---	---	---	---	---	---	---	---	0.018	26	---	---	---	---
GO:0044272	P	sulfur compound biosynthetic process											---	---	---	---	---	---	---	---	---	---	---	---	---	---	0.021	17	---	---	---	---
GO:0042435	P	indole derivative biosynthetic process											---	---	---	---	---	---	---	---	---	---	---	---	---	---	0.025	10	---	---	---	---
GO:0034976	P	response to endoplasmic reticulum stress											---	---	---	---	---	---	---	---	---	---	---	---	---	---	0.025	7	---	---	---	---
GO:0009612	P	response to mechanical stimulus											---	---	---	---	---	---	---	---	---	---	---	---	---	---	0.029	7	---	---	---	---
GO:0031667	P	response to nutrient levels											---	---	---	---	---	---	---	---	---	---	---	---	---	---	0.035	15	---	---	---	---
GO:0031669	P	cellular response to nutrient levels											---	---	---	---	---	---	---	---	---	---	---	---	---	---	0.042	13	---	---	---	---
GO:0051607	P	defense response to virus											---	---	---	---	---	---	---	---	---	---	---	---	---	---	0.048	7	---	---	---	---
GO:0005216	F	ion channel activity											---	---	---	---	---	---	---	---	---	---	---	---	---	---	0.0012	19	---	---	---	---
GO:0005516	F	calmodulin binding											---	---	---	---	---	---	---	---	---	---	---	---	---	---	0.0017	30	---	---	---	---
GO:0004713	F	protein tyrosine kinase activity											---	---	---	---	---	---	---	---	---	---	---	---	---	---	0.0025	27	---	---	---	---
GO:0019199	F	transmembrane receptor protein kinase activity											---	---	---	---	---	---	---	---	---	---	---	---	---	---	0.0031	7	---	---	---	---
GO:0004675	F	transmembrane receptor protein serine/threonine kinase activity											---	---	---	---	---	---	---	---	---	---	---	---	---	---	0.0036	6	---	---	---	---
GO:0005217	F	intracellular ligand-gated ion channel activity											---	---	---	---	---	---	---	---	---	---	---	---	---	---	0.0084	8	---	---	---	---
GO:0005275	F	amine transmembrane transporter activity											---	---	---	---	---	---	---	---	---	---	---	---	---	---	0.01	14	---	---	---	---
GO:0030551	F	cyclic nucleotide binding											---	---	---	---	---	---	---	---	---	---	---	---	---	---	0.01	9	---	---	---	---
GO:0030613	F	oxidoreductase activity, acting on phosphorus or arsenic in donors											---	---	---	---	---	---	---	---	---	---	---	---	---	---	0.011	6	---	---	---	---
GO:0008794	F	arsenate reductase (glutaredoxin) activity											---	---	---	---	---	---	---	---	---	---	---	---	---	---	0.011	6	---	---	---	---
GO:0030614	F	oxidoreductase activity, acting on phosphorus or arsenic in donors, with disulfide as acceptor											---	---	---	---	---	---	---	---	---	---	---	---	---	---	0.011	6	---	---	---	---
GO:0015276	F	ligand-gated ion channel activity											---	---	---	---	---	---	---	---	---	---	---	---	---	---	0.011	9	---	---	---	---
GO:0022834	F	ligand-gated channel activity											---	---	---	---	---	---	---	---	---	---	---	---	---	---	0.011	9	---	---	---	---
GO:0030611	F	arsenate reductase activity											---	---	---	---	---	---	---	---	---	---	---	---	---	---	0.014	6	---	---	---	---
GO:0008324	F	cation transmembrane transporter activity											---	---	---	---	---	---	---	---	---	---	---	---	---	---	0.019	47	---	---	---	---
GO:0043167	F	ion binding											---	---	---	---	---	---	---	---	---	---	---	---	---	---	0.021	152	---	---	---	---
GO:0043169	F	cation binding											---	---	---	---	---	---	---	---	---	---	---	---	---	---	0.021	152	---	---	---	---
GO:0005529	F	sugar binding											---	---	---	---	---	---	---	---	---	---	---	---	---	---	0.022	12	---	---	---	---
GO:0046872	F	metal ion binding											---	---	---	---	---	---	---	---	---	---	---	---	---	---	0.038	144	---	---	---	---
GO:0015035	F	protein disulfide oxidoreductase activity											---	---	---	---	---	---	---	---	---	---	---	---	---	---	0.038	9	---	---	---	---
GO:0042625	F	ATPase activity, coupled to transmembrane movement of ions											---	---	---	---	---	---	---	---	---	---	---	---	---	---	0.048	11	---	---	---	---
GO:0009639	P	response to red or far red light											---	---	---	---	---	---	---	---	---	---	---	---	---	---	---	---	2.1e-07	20	0.00018	32
GO:0019222	P	regulation of metabolic process											---	---	---	---	---	---	---	---	---	---	---	---	---	---	---	---	5.8e-07	76	0.03	163
GO:0010468	P	regulation of gene expression											---	---	---	---	---	---	---	---	---	---	---	---	---	---	---	---	7.8e-06	67	---	---
GO:0060255	P	regulation of macromolecule metabolic process											---	---	---	---	---	---	---	---	---	---	---	---	---	---	---	---	1e-05	68	---	---
GO:0009739	P	response to gibberellin stimulus											---	---	---	---	---	---	---	---	---	---	---	---	---	---	---	---	1e-05	15	0.00018	27
GO:0010017	P	red or far-red light signaling pathway											---	---	---	---	---	---	---	---	---	---	---	---	---	---	---	---	0.00039	7	0.0037	11
GO:0010476	P	gibberellin mediated signaling pathway											---	---	---	---	---	---	---	---	---	---	---	---	---	---	---	---	0.0023	6	0.01	10
GO:0009740	P	gibberellic acid mediated signaling pathway											---	---	---	---	---	---	---	---	---	---	---	---	---	---	---	---	0.0023	6	0.01	10
GO:0009630	P	gravitropism											---	---	---	---	---	---	---	---	---	---	---	---	---	---	---	---	0.0079	6	---	---
GO:0009629	P	response to gravity											---	---	---	---	---	---	---	---	---	---	---	---	---	---	---	---	0.0097	6	---	---
GO:0006807	P	nitrogen compound metabolic process											---	---	---	---	---	---	---	---	---	---	---	---	---	---	---	---	0.019	90	---	---
GO:0009640	P	photomorphogenesis											---	---	---	---	---	---	---	---	---	---	---	---	---	---	---	---	0.029	6	---	---
GO:0009606	P	tropism											---	---	---	---	---	---	---	---	---	---	---	---	---	---	---	---	0.03	6	---	---
GO:0010646	P	regulation of cell communication											---	---	---	---	---	---	---	---	---	---	---	---	---	---	---	---	0.036	8	---	---
GO:0006139	P	nucleobase, nucleoside, nucleotide and nucleic acid metabolic process											---	---	---	---	---	---	---	---	---	---	---	---	---	---	---	---	0.049	75	---	---
GO:0016564	F	transcription repressor activity											---	---	---	---	---	---	---	---	---	---	---	---	---	---	---	---	0.041	6	---	---
GO:0009986	C	cell surface											---	---	---	---	---	---	---	---	---	---	---	---	---	---	---	---	0.0032	5	0.0029	7
GO:0046283	P	anthocyanin metabolic process											---	---	---	---	---	---	---	---	---	---	---	---	---	---	---	---	---	---	0.0071	9
GO:0044271	P	cellular nitrogen compound biosynthetic process											---	---	---	---	---	---	---	---	---	---	---	---	---	---	---	---	---	---	0.024	40
GO:0043900	P	regulation of multi-organism process											---	---	---	---	---	---	---	---	---	---	---	---	---	---	---	---	---	---	0.025	5
GO:0016641	F	oxidoreductase activity, acting on the CH-NH2 group of donors, oxygen as acceptor											---	---	---	---	---	---	---	---	---	---	---	---	---	---	---	---	---	---	0.012	10
GO:0016638	F	oxidoreductase activity, acting on the CH-NH2 group of donors											---	---	---	---	---	---	---	---	---	---	---	---	---	---	---	---	---	---	0.023	11
GO:0005911	C	cell-cell junction											---	---	---	---	---	---	---	---	---	---	---	---	---	---	---	---	---	---	0.016	7
GO:0030054	C	cell junction											---	---	---	---	---	---	---	---	---	---	---	---	---	---	---	---	---	---	0.022	7
GO:0055044	C	symplast											---	---	---	---	---	---	---	---	---	---	---	---	---	---	---	---	---	---	0.041	6
GO:0009506	C	plasmodesma											---	---	---	---	---	---	---	---	---	---	---	---	---	---	---	---	---	---	0.041	6
Footnote:	The colors correspond to enrichment significance P-value, with gray denoting absent category at a given comparison. The P, C on Onto represent the category of GO: Biological Process, Cellular Component, Mollecular Function. The titles along the x-axis mean comparison between different RNA-seq samples.
	"+"indicates up-regulated genes, "-" indicates down-regulated genes
